# Supplementary material
Source: publisher figshare collection journal article supplement (https://diabetesjournals.figshare.com/ndownloader/files/24954482)
Supplement: Supplementary file 1 [file 24954482]

## Supplementary Appendix

This appendix has been provided by the authors to give readers additional information about their work.

Supplement to:

### **Sustained Intensive treatment and Long-term Effects on HbA1c Reduction (SILVER Study) by CGM in persons with type 1 diabetes treated with MDI**

Marcus Lind<sup>1,2</sup>, Arndís F. Ólafsdóttir<sup>1,2</sup>, Irl B. Hirsch<sup>3</sup>, Jan Bolinder<sup>4</sup>, Sofia Dahlqvist<sup>1</sup>, Aldina Pivodic<sup>5,6</sup>, Jarl Hellman<sup>7</sup>, Magnus Wijkman<sup>8</sup>, Erik Schwarcz<sup>9</sup>, Henrik Albrektsson<sup>5</sup>, Tim Heise<sup>10</sup>, William Polonsky<sup>11</sup>

#### **Affiliations**

1 Department of Molecular and Clinical Medicine, University of Gothenburg, Gothenburg, Sweden

2 Department of Medicine, NU-Hospital Group, Uddevalla Sweden

3 University of Washington School of Medicine, Seattle, WA, USA

4 Department of Medicine, Karolinska University Hospital Huddinge, Karolinska Institutet, Stockholm, Sweden

5 Statistiska Konsultgruppen, Gothenburg, Sweden

6 Department of Clinical Neuroscience, Institute of Neuroscience and Physiology, Sahlgrenska Academy, University of Gothenburg, Gothenburg, Sweden

7 Department of Medical Sciences, Uppsala University, Uppsala, Sweden

8 Department of Internal Medicine and Department of Health, Medicine and Caring Sciences,  
Linköping University, Norrköping, Sweden

9 Department of Internal Medicine, Faculty of Medicine and Health, Örebro University,  
Sweden

10 Profil, Neuss, Germany

11 Department of Medicine, University of California, San Diego, California, USA.

## Index

|                                                                                                                                                        |   |
|--------------------------------------------------------------------------------------------------------------------------------------------------------|---|
| <i>Table S1: Comparisons between baseline GOLD and end of SILVER for primary, secondary and exploratory variables (all exploratory analyses)</i> ..... | 4 |
| <i>Table S2 Adverse events</i> .....                                                                                                                   | 6 |
| <i>Table S3 Serious adverse events</i> .....                                                                                                           | 8 |

Table S1: Comparisons between baseline GOLD and end of SILVER for primary, secondary and exploratory variables (all exploratory analyses).

| Continuous variables                                       | Mean (SD)<br>Median (Min; Max)<br>(95% CI for mean for confirmatory tests)<br>n= | Baseline in GOLD study                                     | End of SILVER study                                         | Change from baseline to end of study                                 | p-value within group |
|------------------------------------------------------------|----------------------------------------------------------------------------------|------------------------------------------------------------|-------------------------------------------------------------|----------------------------------------------------------------------|----------------------|
| Categorical variables                                      | n (%)                                                                            |                                                            |                                                             |                                                                      |                      |
| <b>Primary variable</b>                                    |                                                                                  |                                                            |                                                             |                                                                      |                      |
| <b>HbA1c (mmol/mol)</b>                                    |                                                                                  | 68.8 (8.7)<br>67 (50; 102)<br>(67.1; 70.5)<br>n=102        | 63.5 (8.6)<br>63 (46; 88)<br>(61.7; 65.2)<br>n=97           | -4.88 (9.43)<br>-5 (-27; 21)<br>(-6.79; -2.96)<br>n=96               | <.0001               |
| <b>Hba1c (%)</b>                                           |                                                                                  | 8.45 (0.80)<br>8.28 (6.73; 11.49)<br>(8.29; 8.60)<br>n=102 | 7.96 (0.79)<br>7.92 (6.36; 10.21)<br>(7.80; 8.12)<br>n=97   | -0.446 (0.863)<br>-0.458 (-2.471; 1.922)<br>(-0.621; -0.271)<br>n=96 | <.0001               |
| <b>Secondary variables</b>                                 |                                                                                  |                                                            |                                                             |                                                                      |                      |
| <b>Percent of time with glucose levels &lt;3.0 mmol/l</b>  |                                                                                  | 2.12 (2.26)<br>1.66 (0; 12.33)<br>(1.64; 2.59)<br>n=89     | 0.597 (0.949)<br>0.246 (0; 4.936)<br>(0.402; 0.792)<br>n=93 | -1.52 (2.33)<br>-1.12 (-11.68; 3.59)<br>(-2.04; -1.02)<br>n=83       | 0.0002               |
| <b>Percent of time with glucose levels &lt;4.0 mmol/l</b>  |                                                                                  | 5.53 (4.20)<br>4.78 (0; 19.97)<br>(4.65; 6.41)<br>n=89     | 2.86 (2.77)<br>1.92 (0; 14.15)<br>(2.29; 3.44)<br>n=93      | -2.47 (4.33)<br>-2.25 (-17.16; 6.36)<br>(-3.41; -1.54)<br>n=83       | 0.0002               |
| <b>Percent of time with glucose levels 4-10 mmol/l</b>     |                                                                                  | 40.3 (15.8)<br>39.7 (3.5; 134.6)<br>(37.1; 43.5)<br>n=89   | 51.0 (16.2)<br>53.1 (10.2; 86.7)<br>(47.7; 54.3)<br>n=93    | 11.3 (19.1)<br>12.4 (-62.3; 44)<br>(7.1; 15.5)<br>n=83               | <.0001               |
| <b>Exploratory variables</b>                               |                                                                                  |                                                            |                                                             |                                                                      |                      |
| <b>Mean of glucose levels from CGM (mmol/l)</b>            |                                                                                  | 10.8 (1.7)<br>10.5 (7.5; 17.4)<br>n=96                     | 10.1 (1.8)<br>9.8 (7.1; 16.2)<br>n=92                       | -0.64 (2.17)<br>-0.68 (-5.40; 5.60)<br>n=90                          | 0.0060               |
| <b>MAGE for glucose levels from CGM (mmol/l)</b>           |                                                                                  | 10.1 (1.7)<br>10.1 (6.3; 14.2)<br>n=96                     | 7.74 (1.56)<br>7.31 (5.06; 12.01)<br>n=91                   | -2.33 (1.83)<br>-2.38 (-7.53; 2.87)<br>n=89                          | <.0001               |
| <b>SD for glucose levels from CGM (mmol/l)</b>             |                                                                                  | 4.37 (0.67)<br>4.4 (2.65; 5.88)<br>n=96                    | 3.59 (0.71)<br>3.6 (2.12; 5.26)<br>n=92                     | -0.76 (0.72)<br>-0.83 (-2.53; 1.47)<br>n=90                          | <.0001               |
| <b>Percent of time with glucose levels &gt;10.0 mmol/l</b> |                                                                                  | 48.3 (13.1)<br>48.4 (18.3; 79.2)<br>n=96                   | 45.7 (17.5)<br>43.5 (8.7; 89.5)<br>n=90                     | -2.82 (19.60)<br>-3.22 (-41.53; 52.1)<br>n=90                        | 0.18                 |
| <b>Percent of time with glucose levels &gt;13.9 mmol/l</b> |                                                                                  | 22.7 (11.0)<br>21.5 (2; 63.7)<br>n=96                      | 17.4 (15.4)<br>11.9 (0; 68.7)<br>n=90                       | -5.31 (16.24)<br>-7.16 (-33.97; 48.07)<br>n=90                       | 0.0026               |
| <b>Percent of time with glucose levels 5.5-10.0 mmol/l</b> |                                                                                  | 31.0 (12.4)<br>29.5 (3.1; 110.3)<br>n=96                   | 42.6 (13.3)<br>45.2 (9.3; 65.3)<br>n=90                     | 11.4 (14.8)<br>12.9 (-46.4; 36.6)<br>n=90                            | <.0001               |
| <b>Treatment Satisfaction scale total (DTSQs)</b>          |                                                                                  | 25.5 (5.8)<br>26 (4; 36)<br>n=98                           | 31.2 (3.8)<br>32 (21; 36)<br>n=91                           | 5.58 (5.57)<br>5 (-8; 23)<br>n=90                                    | <.0001               |
| <b>WHO-5 Well-Being Index</b>                              |                                                                                  | 59.7 (17.9)<br>64 (12; 92)<br>n=98                         | 66.2 (16.1)<br>68 (16; 100)<br>n=91                         | 6.89 (17.95)<br>4 (-40; 56)<br>n=90                                  | 0.0005               |
| <b>Swe-HFS Behaviour/Avoidance</b>                         |                                                                                  | 1.91 (0.60)<br>1.9 (0.6; 3.7)<br>n=98                      | 1.84 (0.60)<br>1.9 (0.3; 3.5)<br>n=91                       | -0.09 (0.48)<br>0 (-1.4; 1.2)<br>n=90                                | 0.071                |
| <b>Swe-HFS Worry</b>                                       |                                                                                  | 0.90 (0.71)<br>0.77 (0; 3.61)<br>n=97                      | 0.78 (0.65)<br>0.61 (0; 3.38)<br>n=91                       | -0.13 (0.45)<br>-0.08 (-2.08; 1)<br>n=89                             | 0.0092               |
| <b>Problem Areas in Diabetes (SWE-PAID-20) scale</b>       |                                                                                  | 26.0 (17.1)<br>23.1 (0; 83.8)<br>n=98                      | 22.4 (16.0)<br>19.7 (0; 71.1)<br>n=91                       | -3.69 (12.38)<br>-1.84 (-32.5; 34.87)<br>n=90                        | 0.0058               |
| <b>Ipaq Categorical score</b>                              |                                                                                  |                                                            |                                                             |                                                                      |                      |

|                                                                                                                                                                                                                                                                                                                                                                        | Mean (SD)<br>Median (Min; Max)<br>(95% CI for mean for<br>confirmatory tests)<br>n= | Baseline in GOLD<br>study             | End of SILVER<br>study                | Change from baseline<br>to end of study   | p-value<br>within<br>group |
|------------------------------------------------------------------------------------------------------------------------------------------------------------------------------------------------------------------------------------------------------------------------------------------------------------------------------------------------------------------------|-------------------------------------------------------------------------------------|---------------------------------------|---------------------------------------|-------------------------------------------|----------------------------|
| Continuous<br>variables                                                                                                                                                                                                                                                                                                                                                |                                                                                     |                                       |                                       |                                           |                            |
| Categorical<br>variables                                                                                                                                                                                                                                                                                                                                               | n (%)                                                                               |                                       |                                       |                                           |                            |
| <b>Inactive</b>                                                                                                                                                                                                                                                                                                                                                        |                                                                                     | 62 (63.3%)                            | 63 (69.2%)                            | Decrease: 17 (18.9%)                      | 0.18                       |
| <b>Minimally Active</b>                                                                                                                                                                                                                                                                                                                                                |                                                                                     | 6 (6.1%)                              | 3 (3.3%)                              | Equal: 63 (70.0%)                         |                            |
| <b>HEPA active</b>                                                                                                                                                                                                                                                                                                                                                     |                                                                                     | 30 (30.6%)                            | 25 (27.5%)                            | Increase: 10 (11.1%)                      |                            |
| <b>HCQ total score</b>                                                                                                                                                                                                                                                                                                                                                 |                                                                                     | 3.20 (0.50)<br>3.22 (2.11; 4)<br>n=94 | 3.45 (0.43)<br>3.56 (2.22; 4)<br>n=89 | 0.25 (0.47)<br>0.12 (-0.78; 1.56)<br>n=85 | <.0001                     |
| <p>For not normally distributed variables the 95% CI for the mean was estimated by using the inversion of Fisher's non-parametric permutation test.</p> <p>For comparison within groups paired Student's t-test was used for normally distributed variables and Fisher's Non-Parametric Permutation test for matched pairs for not normally distributed variables.</p> |                                                                                     |                                       |                                       |                                           |                            |

Table S2 Adverse events

| SOC<br>PT                                                   | CGM (DexCom<br>G4)<br>(n=107) |                                     |
|-------------------------------------------------------------|-------------------------------|-------------------------------------|
|                                                             | Events                        | Subjects<br>with<br>Events<br>n (%) |
| <b>Any Event</b>                                            | <b>104</b>                    | <b>60 (56.1%)</b>                   |
| <b>Blood and lymphatic system disorders</b>                 | <b>1</b>                      | <b>1 (0.9%)</b>                     |
| Iron deficiency anaemia                                     | 1                             | 1 (0.9%)                            |
| <b>Eye disorders</b>                                        | <b>3</b>                      | <b>3 (2.8%)</b>                     |
| Eye oedema                                                  | 1                             | 1 (0.9%)                            |
| Glaucoma                                                    | 1                             | 1 (0.9%)                            |
| Panophthalmitis                                             | 1                             | 1 (0.9%)                            |
| <b>Gastrointestinal disorders</b>                           | <b>3</b>                      | <b>3 (2.8%)</b>                     |
| Abdominal pain upper                                        | 1                             | 1 (0.9%)                            |
| Diarrhoea                                                   | 2                             | 2 (1.9%)                            |
| <b>General disorders and administration site conditions</b> | <b>6</b>                      | <b>6 (5.6%)</b>                     |
| Application site eczema                                     | 1                             | 1 (0.9%)                            |
| Fatigue                                                     | 1                             | 1 (0.9%)                            |
| Oedema                                                      | 1                             | 1 (0.9%)                            |
| Pain                                                        | 1                             | 1 (0.9%)                            |
| Pyrexia                                                     | 2                             | 2 (1.9%)                            |
| <b>Infections and infestations</b>                          | <b>41</b>                     | <b>30 (28.0%)</b>                   |
| Bronchitis                                                  | 2                             | 2 (1.9%)                            |
| Erysipelas                                                  | 1                             | 1 (0.9%)                            |
| Gastroenteritis                                             | 3                             | 3 (2.8%)                            |
| Genital candidiasis                                         | 1                             | 1 (0.9%)                            |
| Infection                                                   | 1                             | 1 (0.9%)                            |
| Lyme disease                                                | 1                             | 1 (0.9%)                            |
| Nasopharyngitis                                             | 23                            | 18 (16.8%)                          |
| Otitis media chronic                                        | 1                             | 1 (0.9%)                            |
| Pneumonia                                                   | 1                             | 1 (0.9%)                            |
| Pyelonephritis                                              | 2                             | 2 (1.9%)                            |
| Respiratory tract infection                                 | 1                             | 1 (0.9%)                            |
| Sinusitis                                                   | 1                             | 1 (0.9%)                            |
| Tooth infection                                             | 1                             | 1 (0.9%)                            |
| Urinary tract infection                                     | 1                             | 1 (0.9%)                            |
| Wound infection                                             | 1                             | 1 (0.9%)                            |
| <b>Injury, poisoning and procedural complications</b>       | <b>4</b>                      | <b>4 (3.7%)</b>                     |
| Fall                                                        | 2                             | 2 (1.9%)                            |
| Foot fracture                                               | 1                             | 1 (0.9%)                            |
| Subdural haematoma                                          | 1                             | 1 (0.9%)                            |
| <b>Metabolism and nutrition disorders</b>                   | <b>10</b>                     | <b>9 (8.4%)</b>                     |
| Hyperglycaemia                                              | 1                             | 1 (0.9%)                            |
| Any hypoglycaemia                                           | 9                             | 8 (7.5%)                            |
| Severe hypoglycaemia                                        | 5                             | 4 (3.7%)                            |
| <b>Musculoskeletal and connective tissue disorders</b>      | <b>7</b>                      | <b>7 (6.5%)</b>                     |
| Arthritis                                                   | 1                             | 1 (0.9%)                            |
| Back pain                                                   | 1                             | 1 (0.9%)                            |

| SOC<br>PT                                                                  | CGM (DexCom<br>G4)<br>(n=107) |                                     |
|----------------------------------------------------------------------------|-------------------------------|-------------------------------------|
|                                                                            | Events                        | Subjects<br>with<br>Events<br>n (%) |
| Exostosis                                                                  | 1                             | 1 (0.9%)                            |
| Osteoarthritis                                                             | 1                             | 1 (0.9%)                            |
| Pain in extremity                                                          | 1                             | 1 (0.9%)                            |
| Rheumatoid arthritis                                                       | 1                             | 1 (0.9%)                            |
| Synovitis                                                                  | 1                             | 1 (0.9%)                            |
| <b>Neoplasms benign, malignant and unspecified (incl cysts and polyps)</b> | <b>2</b>                      | <b>2 (1.9%)</b>                     |
| Melanocytic naevus                                                         | 1                             | 1 (0.9%)                            |
| Papilloma                                                                  | 1                             | 1 (0.9%)                            |
| <b>Nervous system disorders</b>                                            | <b>4</b>                      | <b>4 (3.7%)</b>                     |
| Carpal tunnel syndrome                                                     | 2                             | 2 (1.9%)                            |
| Hypoaesthesia                                                              | 1                             | 1 (0.9%)                            |
| Syncope                                                                    | 1                             | 1 (0.9%)                            |
| <b>Psychiatric disorders</b>                                               | <b>2</b>                      | <b>2 (1.9%)</b>                     |
| Depression                                                                 | 2                             | 2 (1.9%)                            |
| <b>Reproductive system and breast disorders</b>                            | <b>1</b>                      | <b>1 (0.9%)</b>                     |
| Epididymitis                                                               | 1                             | 1 (0.9%)                            |
| <b>Respiratory, thoracic and mediastinal disorders</b>                     | <b>1</b>                      | <b>1 (0.9%)</b>                     |
| Pleurisy                                                                   | 1                             | 1 (0.9%)                            |
| <b>Skin and subcutaneous tissue disorders</b>                              | <b>12</b>                     | <b>7 (6.5%)</b>                     |
| Eczema                                                                     | 2                             | 2 (1.9%)                            |
| Lipohypertrophy                                                            | 1                             | 1 (0.9%)                            |
| Pruritus                                                                   | 1                             | 1 (0.9%)                            |
| Rash generalised                                                           | 1                             | 1 (0.9%)                            |
| Skin ulcer                                                                 | 7                             | 3 (2.8%)                            |
| <b>Surgical and medical procedures</b>                                     | <b>6</b>                      | <b>5 (4.7%)</b>                     |
| Cataract operation                                                         | 3                             | 2 (1.9%)                            |
| Eye operation                                                              | 1                             | 1 (0.9%)                            |
| Gastrectomy                                                                | 1                             | 1 (0.9%)                            |
| Vitrectomy                                                                 | 1                             | 1 (0.9%)                            |
| <b>Vascular disorders</b>                                                  | <b>1</b>                      | <b>1 (0.9%)</b>                     |
| Hypotension                                                                | 1                             | 1 (0.9%)                            |
| 2019-12-02 derive.sas                                                      |                               |                                     |

Table S3 Serious adverse events

| SOC<br>PT                                             | CGM (DexCom<br>G4)<br>(n=107) |                                     |
|-------------------------------------------------------|-------------------------------|-------------------------------------|
|                                                       | Events                        | Subjects<br>with<br>Events<br>n (%) |
| <b>Any Event</b>                                      | <b>9</b>                      | <b>6 (5.6%)</b>                     |
| <b>Infections and infestations</b>                    | <b>1</b>                      | <b>1 (0.9%)</b>                     |
| Gastroenteritis                                       | 1                             | 1 (0.9%)                            |
| <b>Injury, poisoning and procedural complications</b> | <b>2</b>                      | <b>2 (1.9%)</b>                     |
| Fall                                                  | 1                             | 1 (0.9%)                            |
| Subdural haematoma                                    | 1                             | 1 (0.9%)                            |
| <b>Nervous system disorders</b>                       | <b>1</b>                      | <b>1 (0.9%)</b>                     |
| Syncope                                               | 1                             | 1 (0.9%)                            |
| <b>Skin and subcutaneous tissue disorders</b>         | <b>3</b>                      | <b>1 (0.9%)</b>                     |
| Skin ulcer                                            | 3                             | 1 (0.9%)                            |
| <b>Surgical and medical procedures</b>                | <b>1</b>                      | <b>1 (0.9%)</b>                     |
| Gastrectomy                                           | 1                             | 1 (0.9%)                            |
| <b>Vascular disorders</b>                             | <b>1</b>                      | <b>1 (0.9%)</b>                     |
| Hypotension                                           | 1                             | 1 (0.9%)                            |
| 2019-12-02 derive.sas                                 |                               |                                     |
